# Supplementary material
Source: PubMed Central journal article supplement (PMC3229672)
Supplement: NIHMS319485-supplement-ESM_Figure_1.pdf [file NIHMS319485-supplement-ESM_Figure_1.pdf]

**ESM Figure 1.** Study flow of the three cohorts

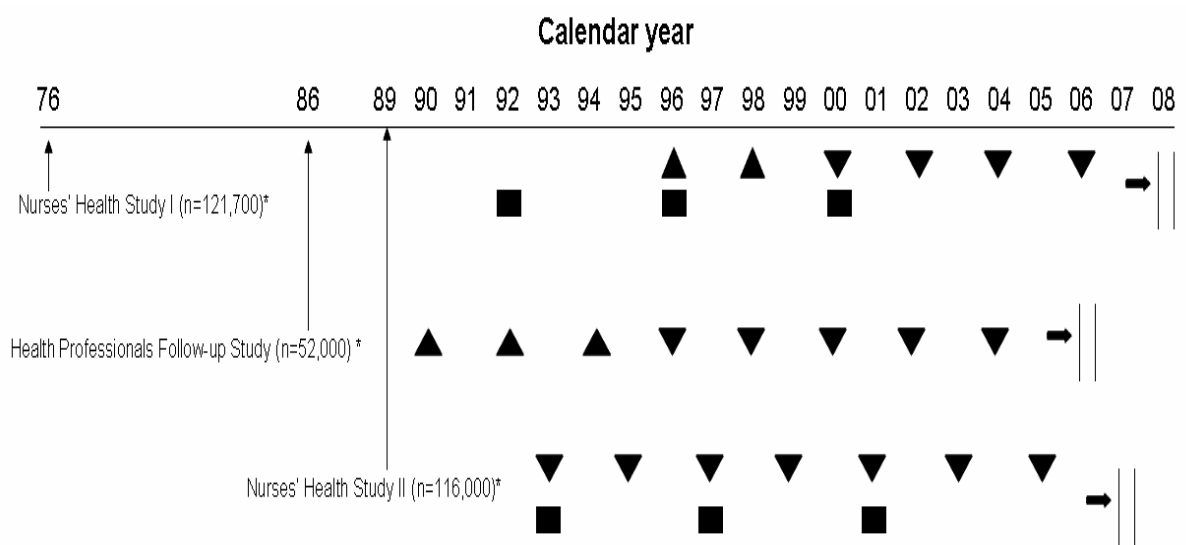

\* The baseline years of current analysis were 1996 for NHS I (mean age 61.0, range 50-79), 1990 for HPFS (mean age 56.4, range 43-80), and 1993 for NHS II (mean age 38.2, range 29-46)

▲ Regular antidepressant medication

▼ Different types of antidepressant medication (SSRIs, TCAs and others)

■ Depressive symptoms score (five-item Mental Health Index)
