# Supplementary material
Source: PubMed Central journal article supplement (PMC3229672)
Supplement: NIHMS319485-supplement-ESM_Table_1.pdf [file NIHMS319485-supplement-ESM_Table_1.pdf]

**ESM Table 1.** Stratified analysis by selected characteristics.<sup>a</sup>

|                                       | HPFS (1990-2006) |                  | NHS I (1996-2008) |                  | NHS II (1993-2007) |                  | Pooled (Random effects model) |
|---------------------------------------|------------------|------------------|-------------------|------------------|--------------------|------------------|-------------------------------|
|                                       | No ADM           | ADM              | No ADM            | ADM              | No ADM             | ADM              | ADM users vs. non-users       |
| Age group <sup>b</sup>                |                  |                  |                   |                  |                    |                  |                               |
| Young group                           | 1.00             | 1.43 (1.03-1.99) | 1.00              | 0.98 (0.85-1.13) | 1.00               | 1.26 (1.04-1.52) |                               |
| Old group                             | 1.00             | 1.32 (0.90-1.94) | 1.00              | 1.19 (1.04-1.37) | 1.00               | 1.22 (1.07-1.39) |                               |
| BMI categories                        |                  |                  |                   |                  |                    |                  |                               |
| <25 kg/m <sup>2</sup>                 | 1.00             | 0.91 (0.44-1.87) | 1.00              | 1.21 (0.90-1.62) | 1.00               | 1.48 (0.86-2.57) | 1.22 (0.96-1.55) <sup>c</sup> |
| ≥25 kg/m <sup>2</sup>                 | 1.00             | 1.45 (1.10-1.91) | 1.00              | 1.08 (0.97-1.20) | 1.00               | 1.31 (1.18-1.47) | 1.24 (1.05-1.46)              |
| Weight gain (≥ 5% of baseline weight) |                  |                  |                   |                  |                    |                  |                               |
| Yes                                   | 1.00             | 2.50 (1.16-5.39) | 1.00              | 1.07 (0.86-1.33) | 1.00               | 1.23 (1.02-1.48) | 1.19 (1.04-1.37) <sup>c</sup> |

|                                  |      |                  |      |                  |      |                               |                               |
|----------------------------------|------|------------------|------|------------------|------|-------------------------------|-------------------------------|
| No                               | 1.00 | 1.29 (0.98-1.70) | 1.00 | 1.08 (0.96-1.21) | 1.00 | 1.23 (1.08-1.40)              | 1.16 (1.06-1.25) <sup>c</sup> |
| Presence of hypertension         |      |                  |      |                  |      |                               |                               |
| Yes                              | 1.00 | 1.24 (0.90-1.72) | 1.00 | 1.09 (0.97-1.22) | 1.00 | 1.14 (0.99-1.32) <sup>d</sup> | 1.12 (1.02-1.22) <sup>c</sup> |
| No                               | 1.00 | 1.54 (1.03-2.30) | 1.00 | 1.13 (0.92-1.38) | 1.00 | 1.36 (1.16-1.60) <sup>d</sup> | 1.29 (1.14-1.45) <sup>c</sup> |
| Presence of hypercholesterolemia |      |                  |      |                  |      |                               |                               |
| Yes                              | 1.00 | 1.29 (0.95-1.75) | 1.00 | 1.13 (1.01-1.26) | 1.00 | 1.13 (0.98-1.30) <sup>e</sup> | 1.14 (1.05-1.24) <sup>c</sup> |
| No                               | 1.00 | 1.69 (1.10-2.61) | 1.00 | 1.05 (0.85-1.30) | 1.00 | 1.41 (1.20-1.66) <sup>e</sup> | 1.31 (1.02-1.68)              |

Abbreviations: ADM, antidepressant medication; BMI, body-mass index; HPFS, Health Professional Follow-up Study; NA, not available; NHS: Nurses' Health Study.

<sup>a</sup>Hazard risks were adjusted for age (continuous), and body-mass index (<23.0, 23.0-24.9, 25.0-29.9, 30.0-34.9, and ≥35.0 kg/m<sup>2</sup>), ethnicity (whites, non-whites), marital status (having spouse or not), living status (alone, with others), smoking status (never smoked, past smoker, current smoker), alcohol intake (0, 0.1-4.9, 5.0-14.9, ≥15.0 g/d in women; 0, 0.1-4.9, 5.0-29.9, ≥30.0 g/d in men), multivitamin and aspirin use (yes, no), physical activity (<3.0, 3.0-8.9, 9.0-17.9, 18.0-26.9, ≥27.0 metabolic equivalent-hours/week), family history of diabetes, quintile of dietary score, and major comorbidities (history of hypertension, hypercholesterolemia, and their treatments). Among women, we also adjusted for menopausal status and hormone use, and oral contraceptive use (NHS II participants only).

<sup>b</sup>The cut-off point for young and old age group was 65 years old in NHS I and HPFS, while 45 years old in NHS II. Therefore, the pooled analysis was not performed.

<sup>c</sup>Fixed effect model was chosen due to non-significant heterogeneity statistic.

<sup>d</sup> $p$  for interaction = 0.013.

<sup>e</sup> $p$  for interaction = 0.007.
